# Supplementary material for: Immune memory shapes human polyclonal antibody responses to H2N2 vaccination
Source: PubMed Central journal article supplement (PMC10541104; doi:10.1101/2023.08.23.554525), 2023-08-24
Supplement: media-1.pdf [file media-1.pdf]

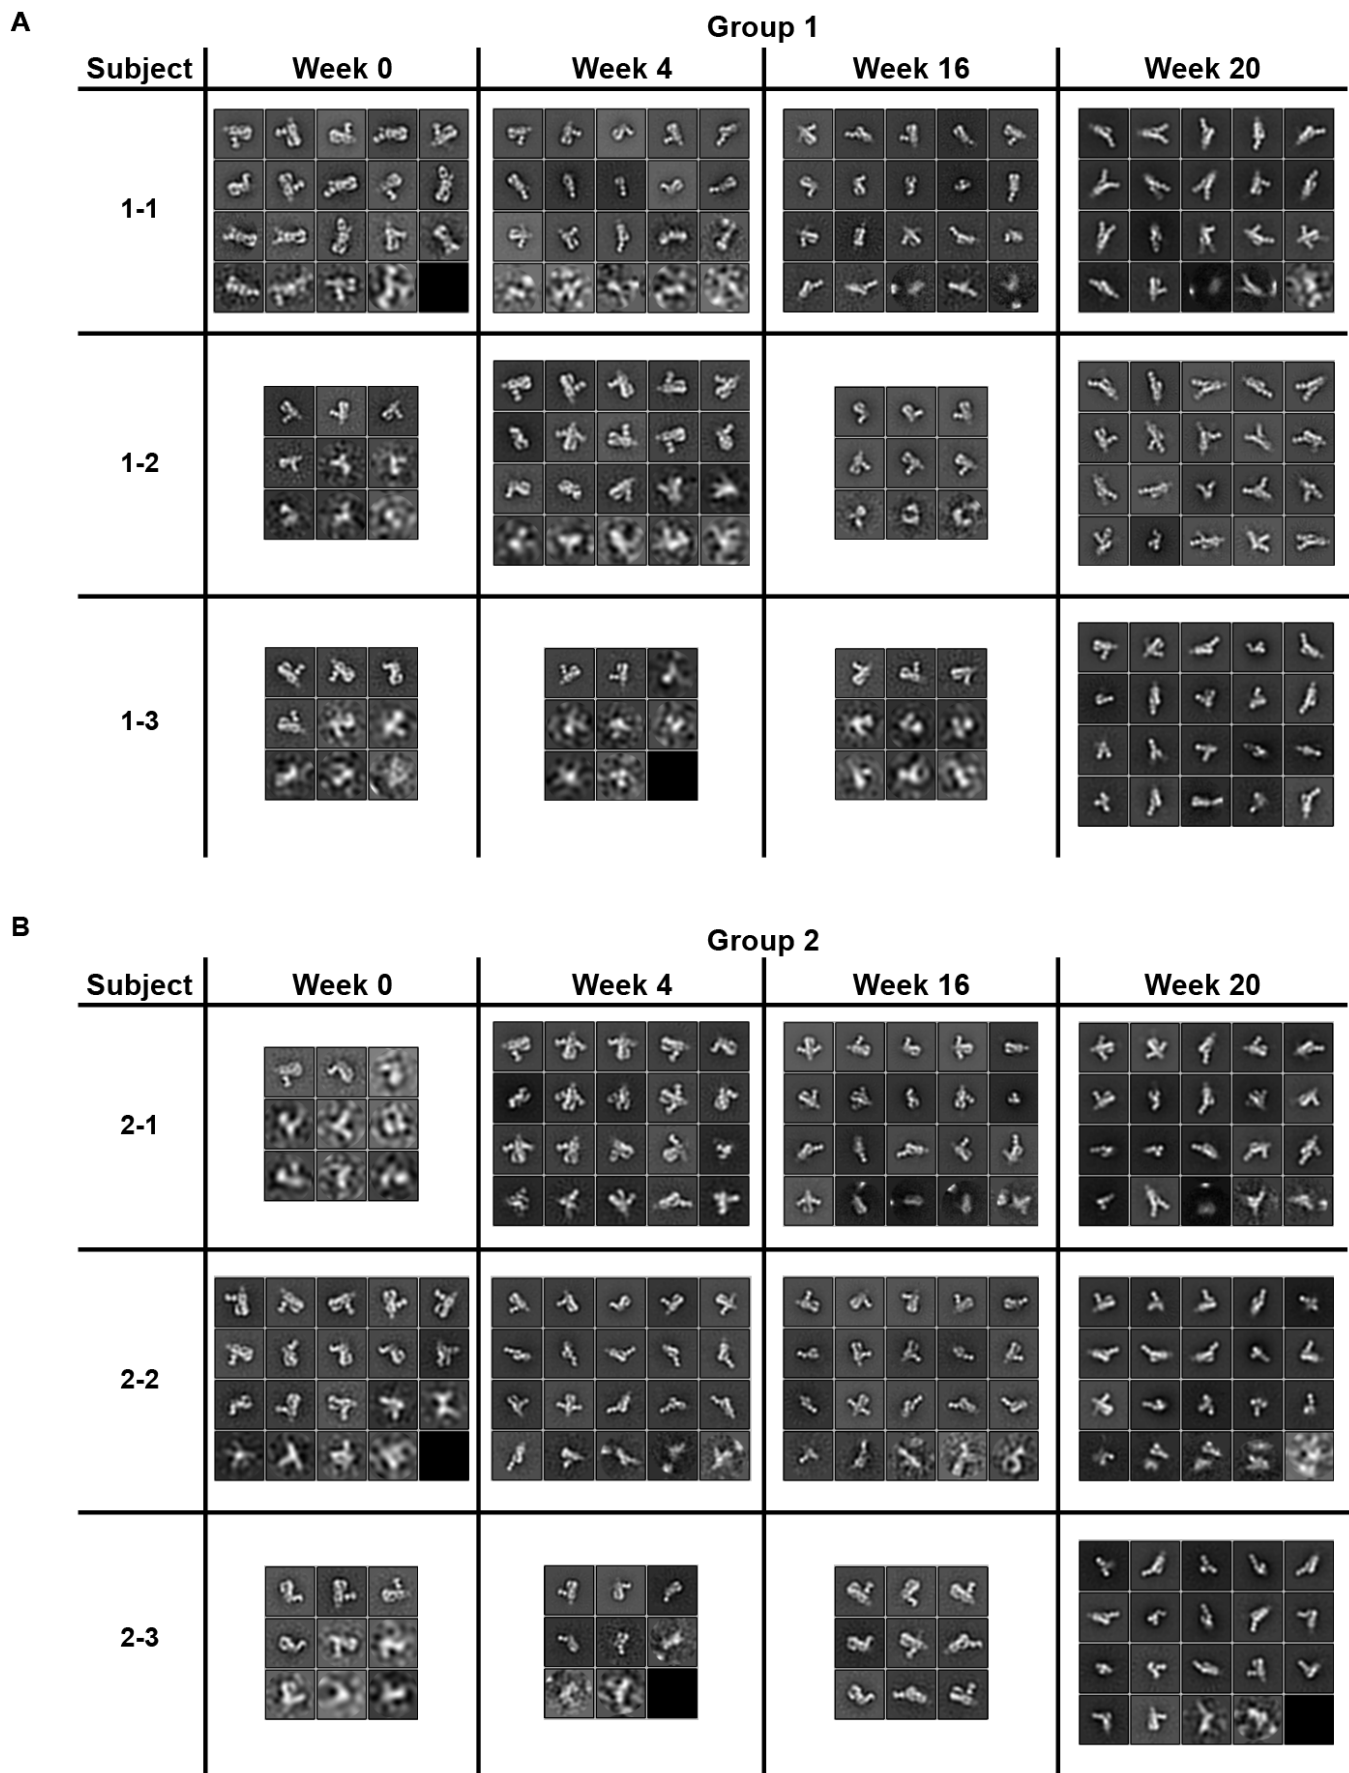

**Figure S1: Group 1 and 2 sample 2D classes.** Related to Figure 2. Sample 2D classes that make up 3D models shown in Figure 2 for Group 1 (A) and Group 2 (B). Datasets with >7.3k particles are divided into 20 classes while those with <7.3k particles are divided into 9. All 2D classification datasets are shown in order of descending particle count.

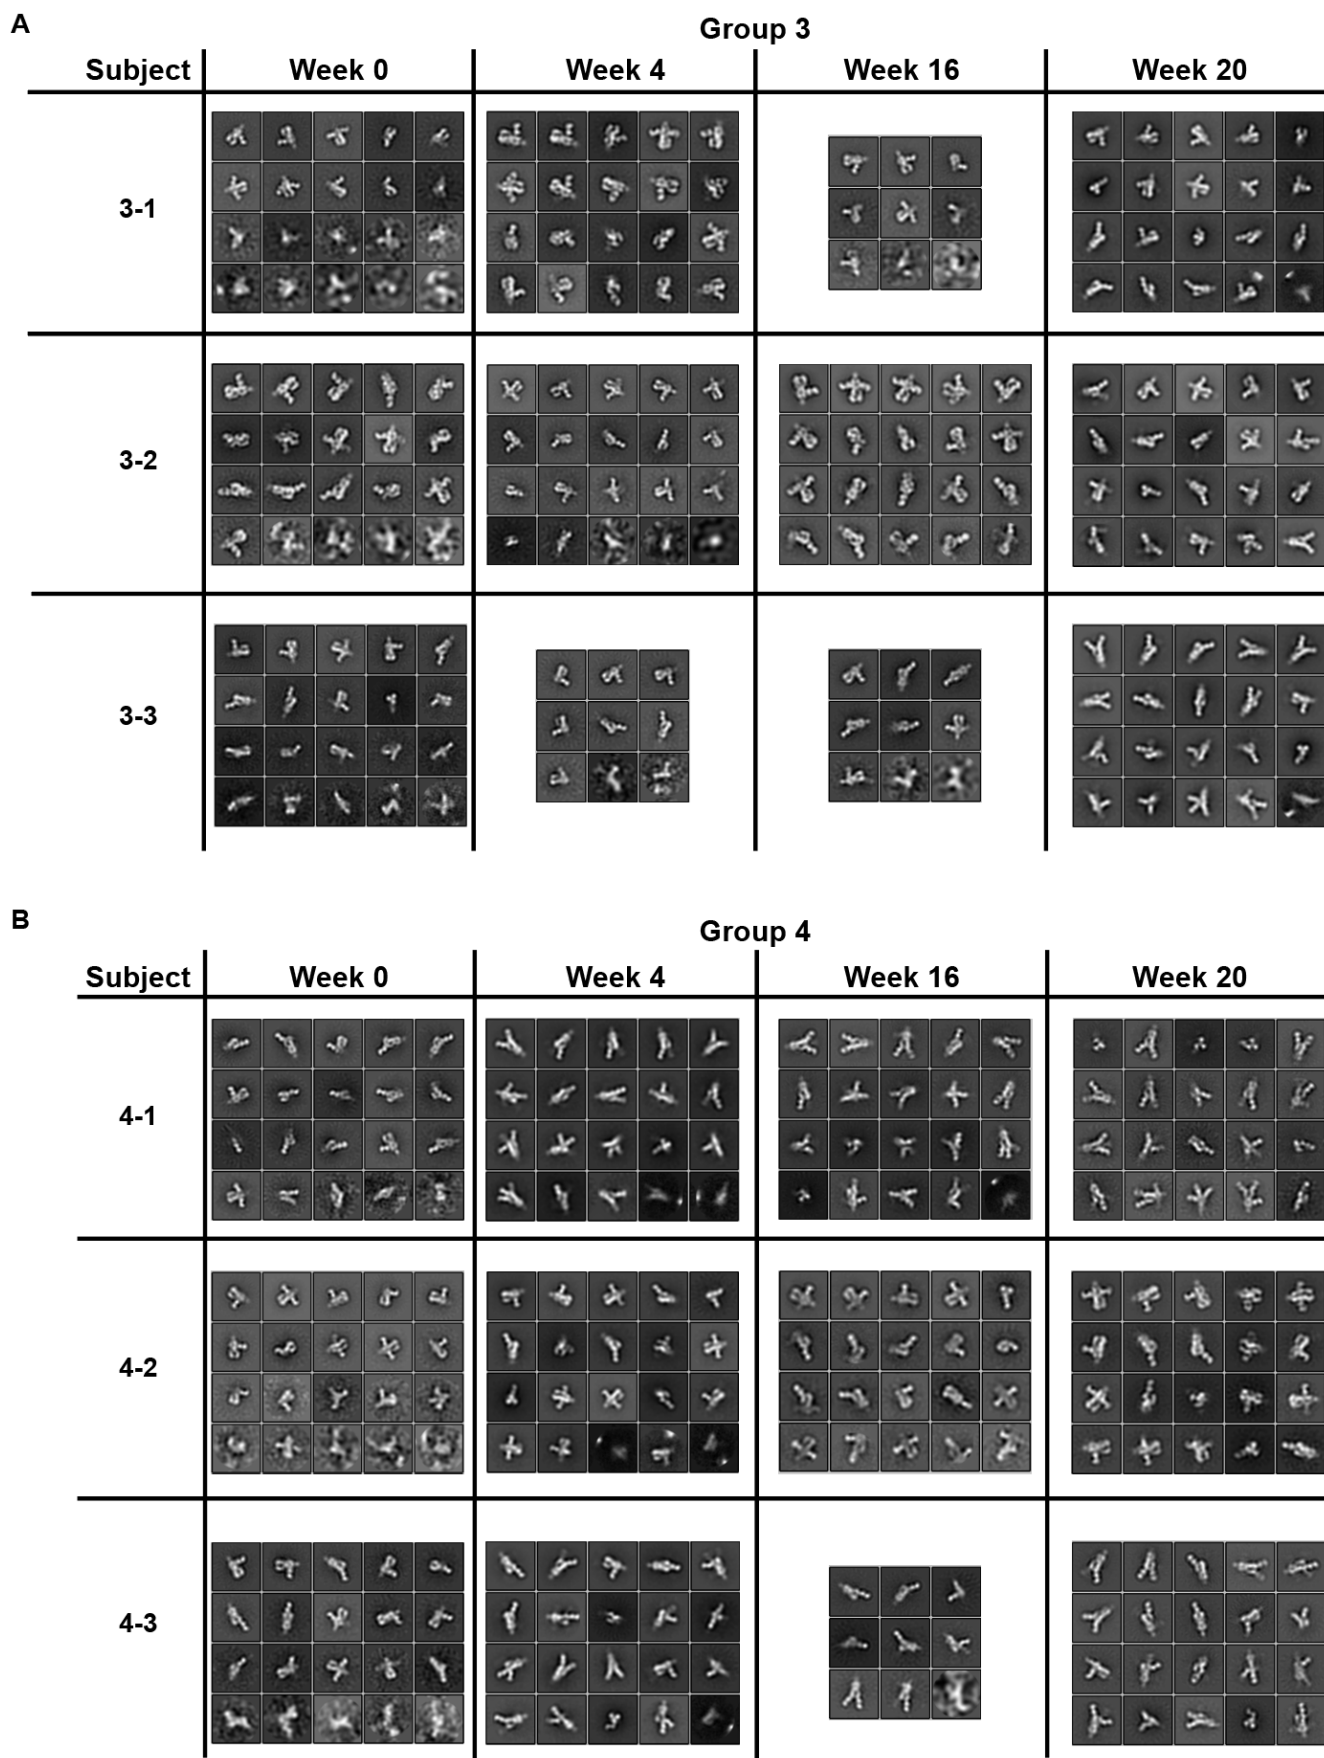

**Figure S2: Group 3 and 4 sample 2D classes.** Related to Figure 2. Sample 2D classes that make up 3D models shown in Figure 2 for Group 3 (A) and Group 4 (B). Datasets with >7.3k particles are divided into 20 classes while those with <7.3k particles are divided into 9. All 2D classification datasets are shown in order of descending particle count.

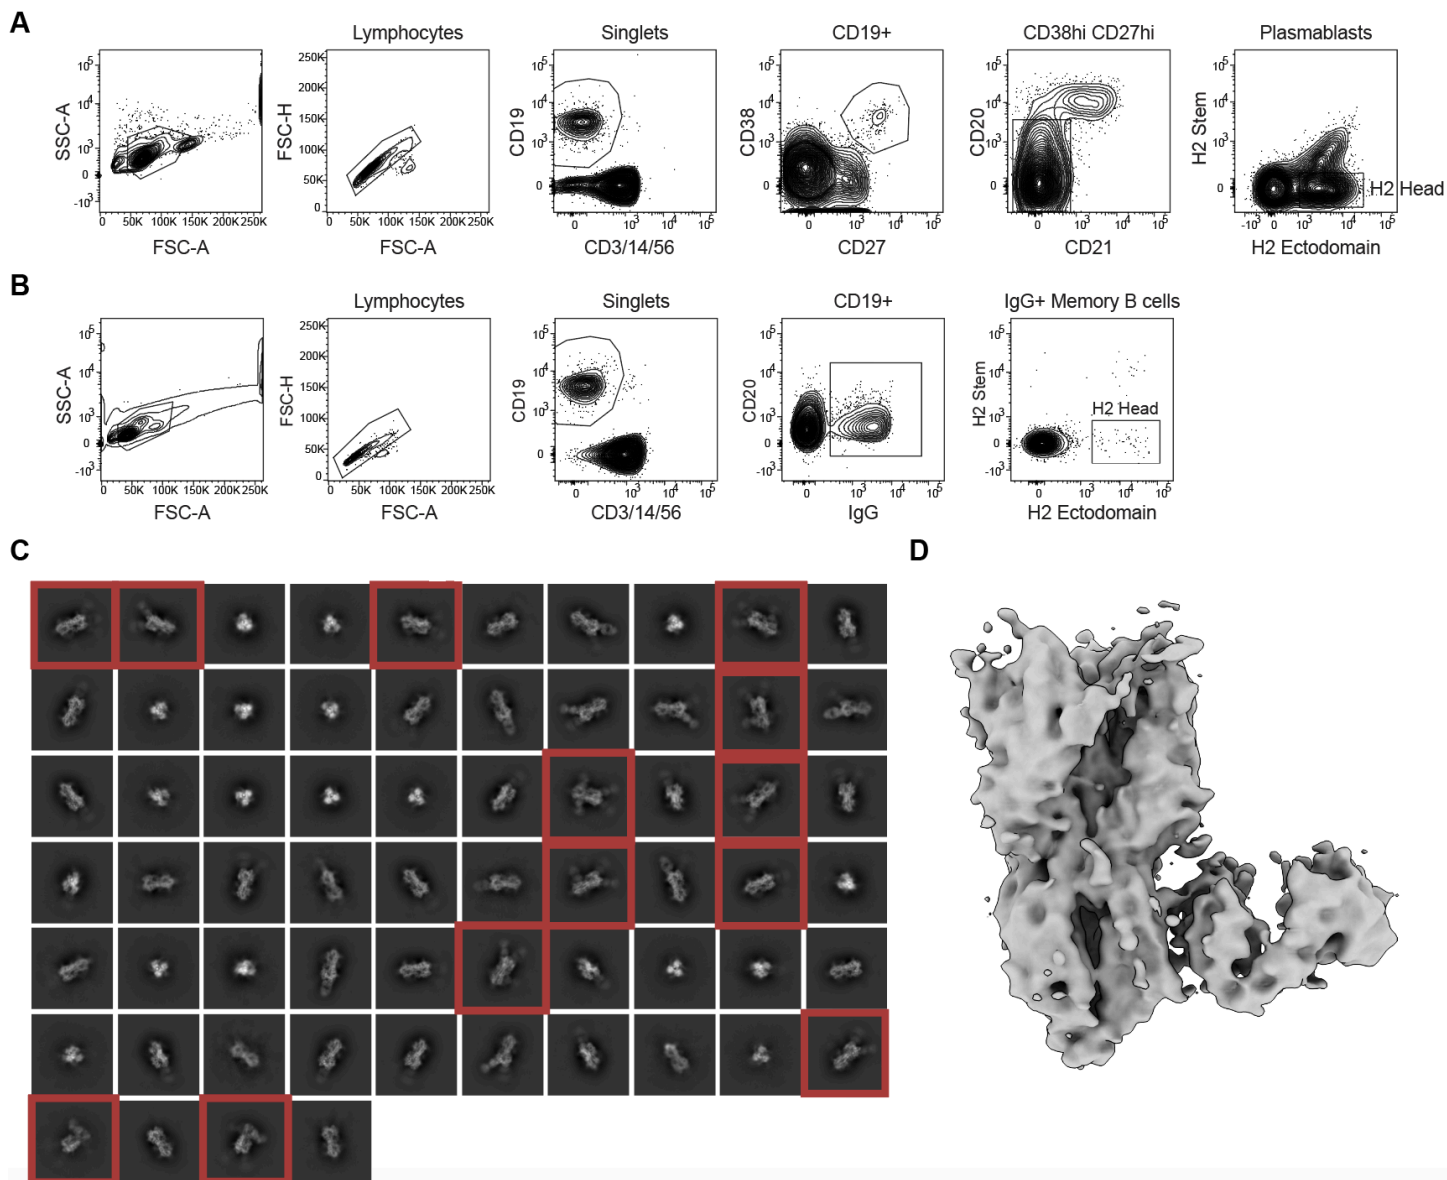

**Figure S3: B-cell sorting strategy and polyclonal stem responses observed by cryo-EM.** Related to Figure 4 and 5. Flow cytometry gates used to detect and sort H2 HA head-specific B cells from the CD19<sup>+</sup> CD3/14/56 (dump)- CD27<sup>hi</sup> CD38<sup>hi</sup> CD20<sup>lo</sup> CD21<sup>lo</sup> plasmablast (A) or CD19<sup>+</sup> CD3/14/56 (dump)- CD20<sup>+</sup> IgG<sup>+</sup> memory B cell compartment (B). Each plot shows the cell population gated immediately to the left as indicated above each plot. H2 HA head-specific B cells were detected as H2 HA ectodomain<sup>+</sup> H2 stem<sup>-</sup>. (C) 2D classes of HA bound to polyclonal antibodies. Classes featuring pFabs with stem specificities outlined in red. (D) 3D reconstruction of stem-specific pFab.

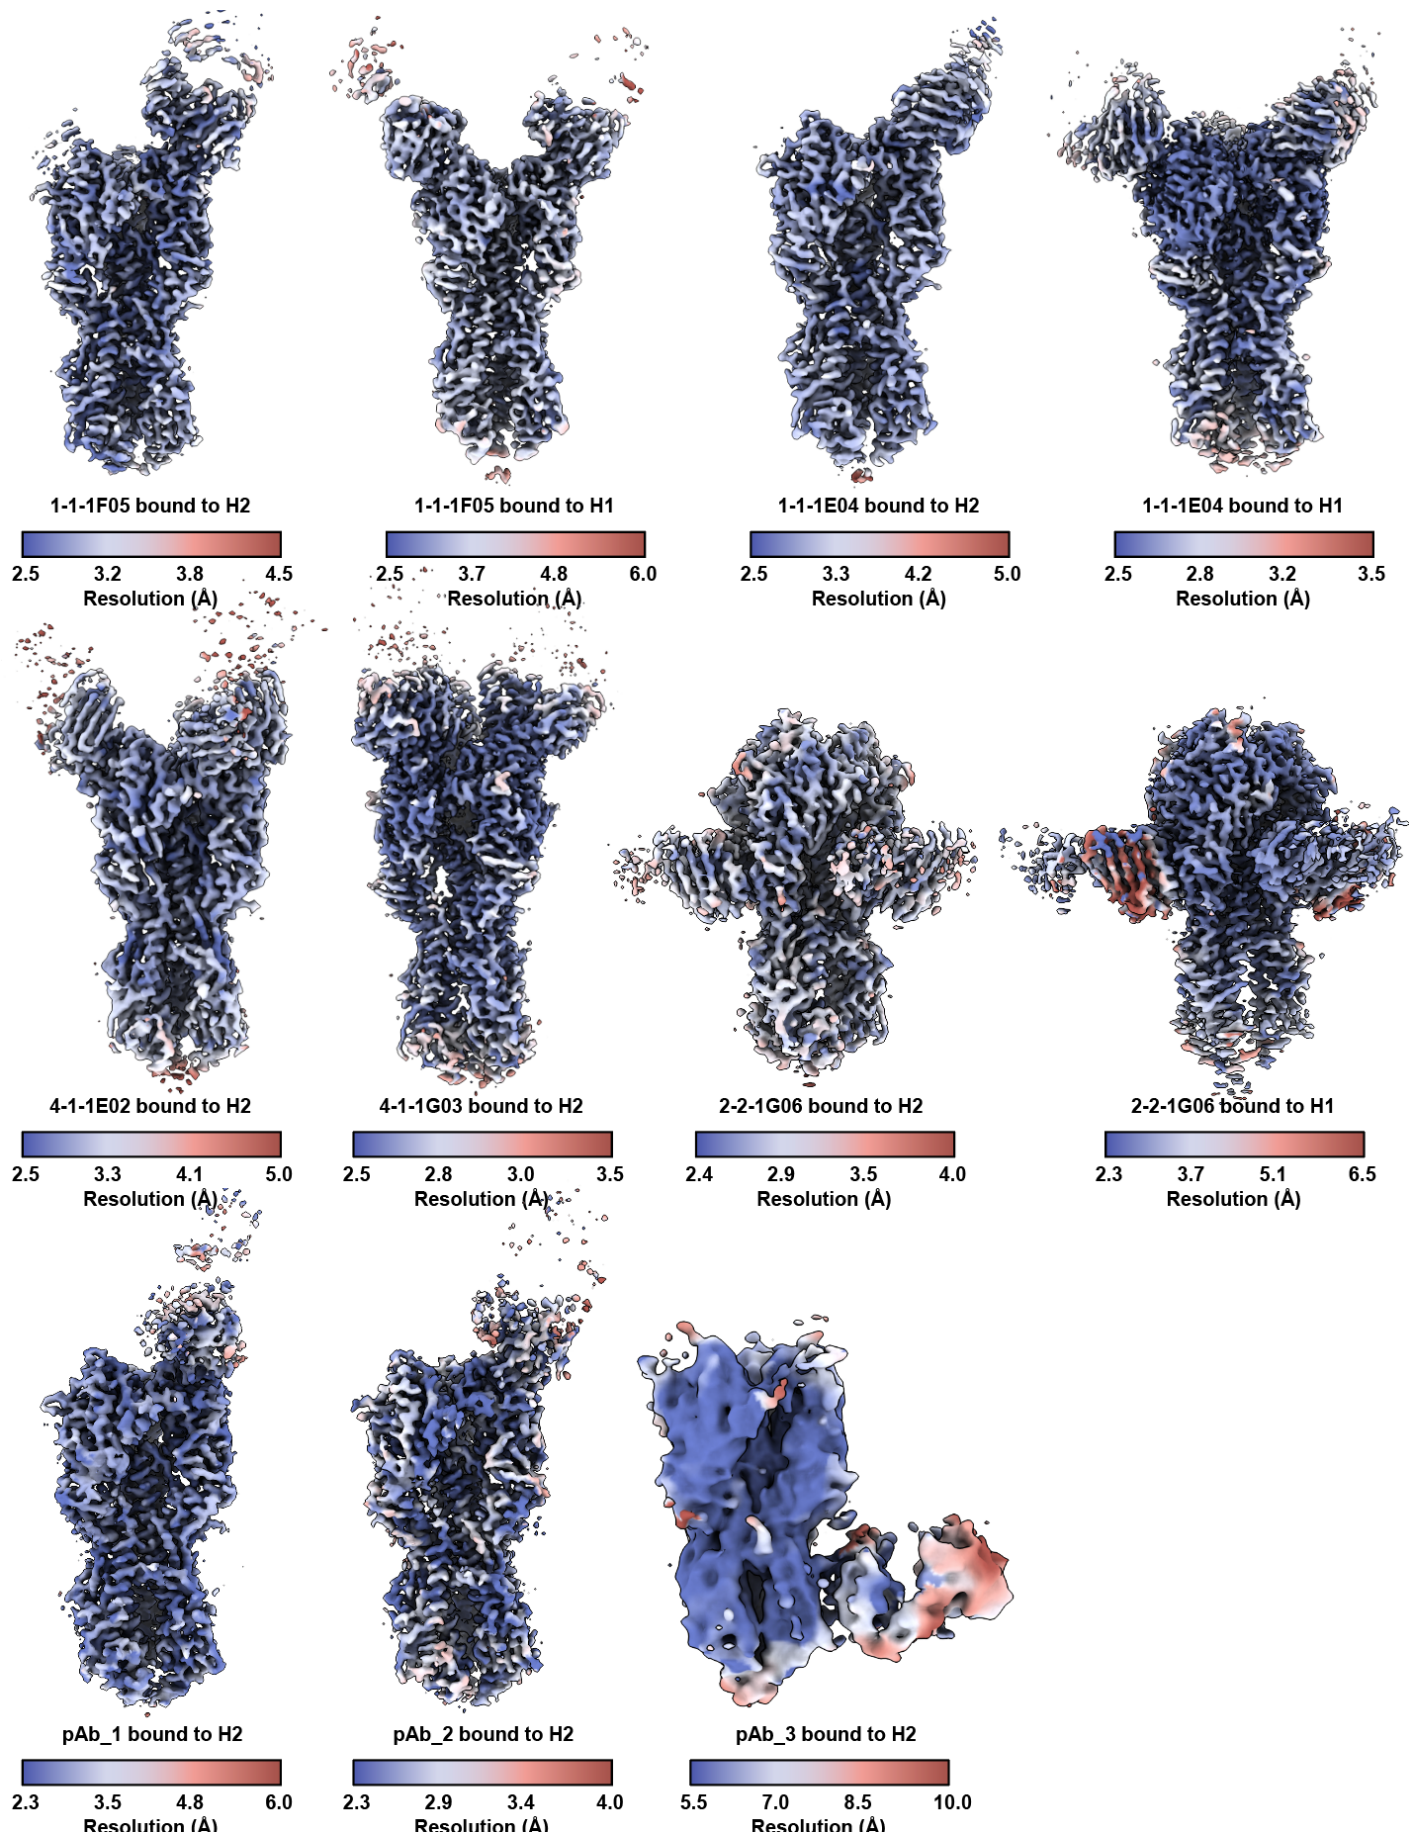

**Figure S4: Local resolution plots of EM maps.** Related to Figures 5, 6, and 7. Local resolution was calculated according to a 0.143 FSC threshold in cryoSPARC 3.2 and visualized in ChimeraX.

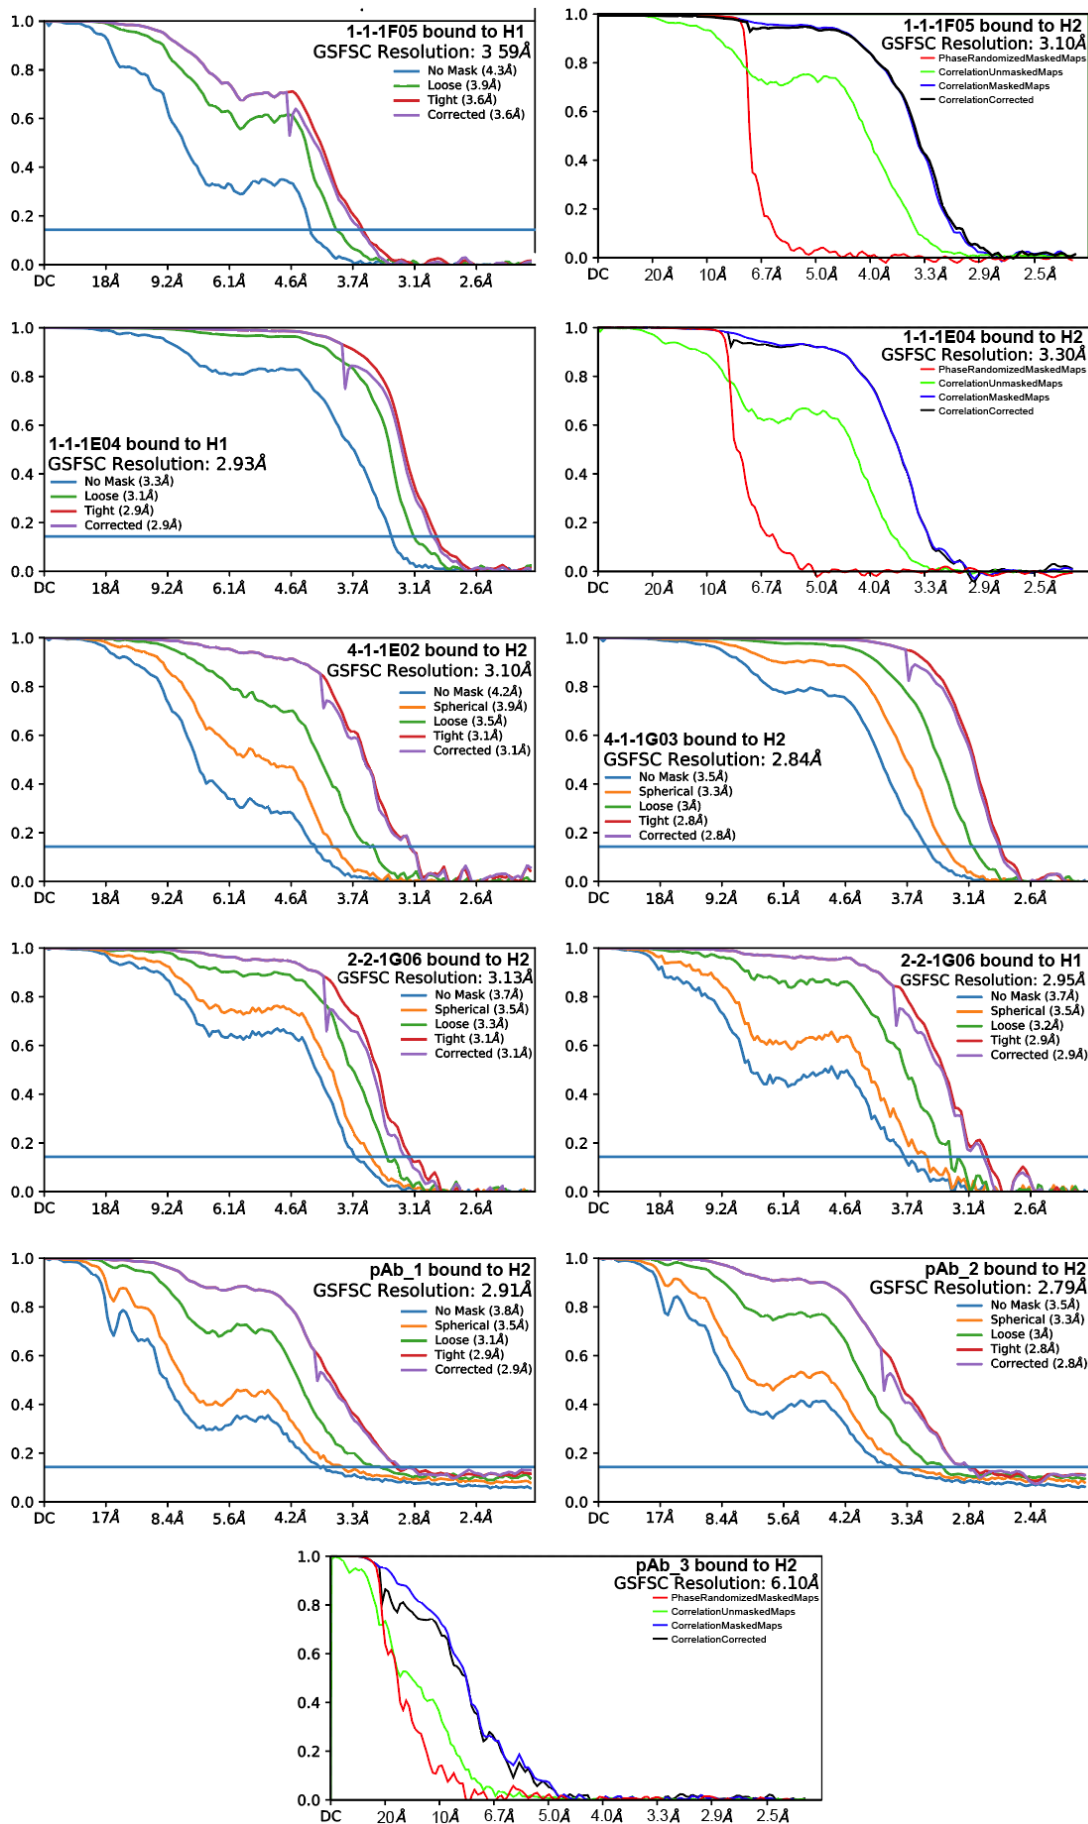

**Figure S5: FSC plots for EM maps.** Related to Figures 5, 6, and 7. Reported resolutions coincide with an FSC cutoff of 0.143. Plots were generated in cryoSPARC 3.2 or Relion.

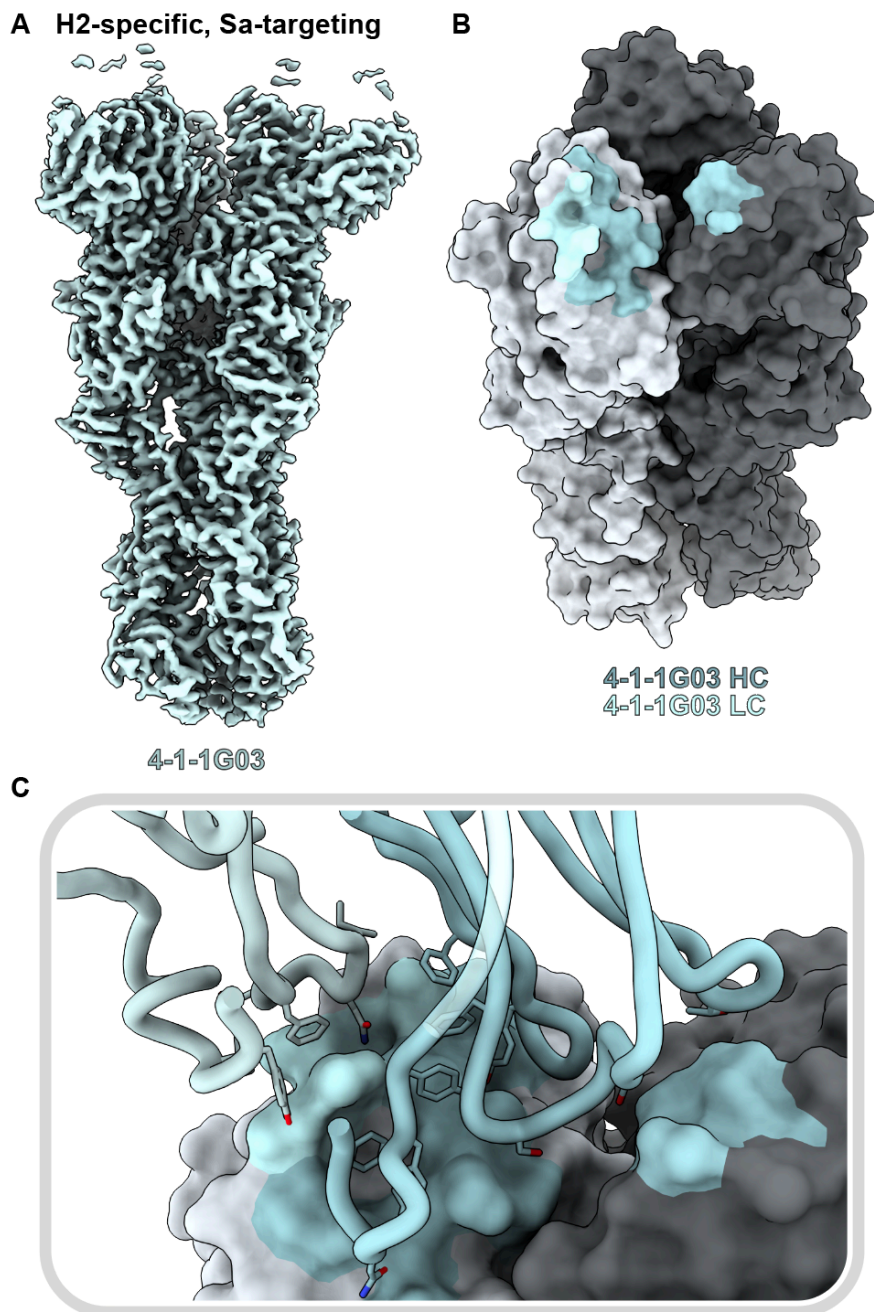

**Figure S6: MAb 4-1-1G03 structural characterization.** Related to Figure 6. (A) cryoEM density map of 4-1-1G03 Fab complexed with H2. (B) Antibody footprint of 4-1-1G03 colored to indicate heavy and light chain interactions on H2. (C) Antibody loop interactions with the SA epitope with key residues shown.

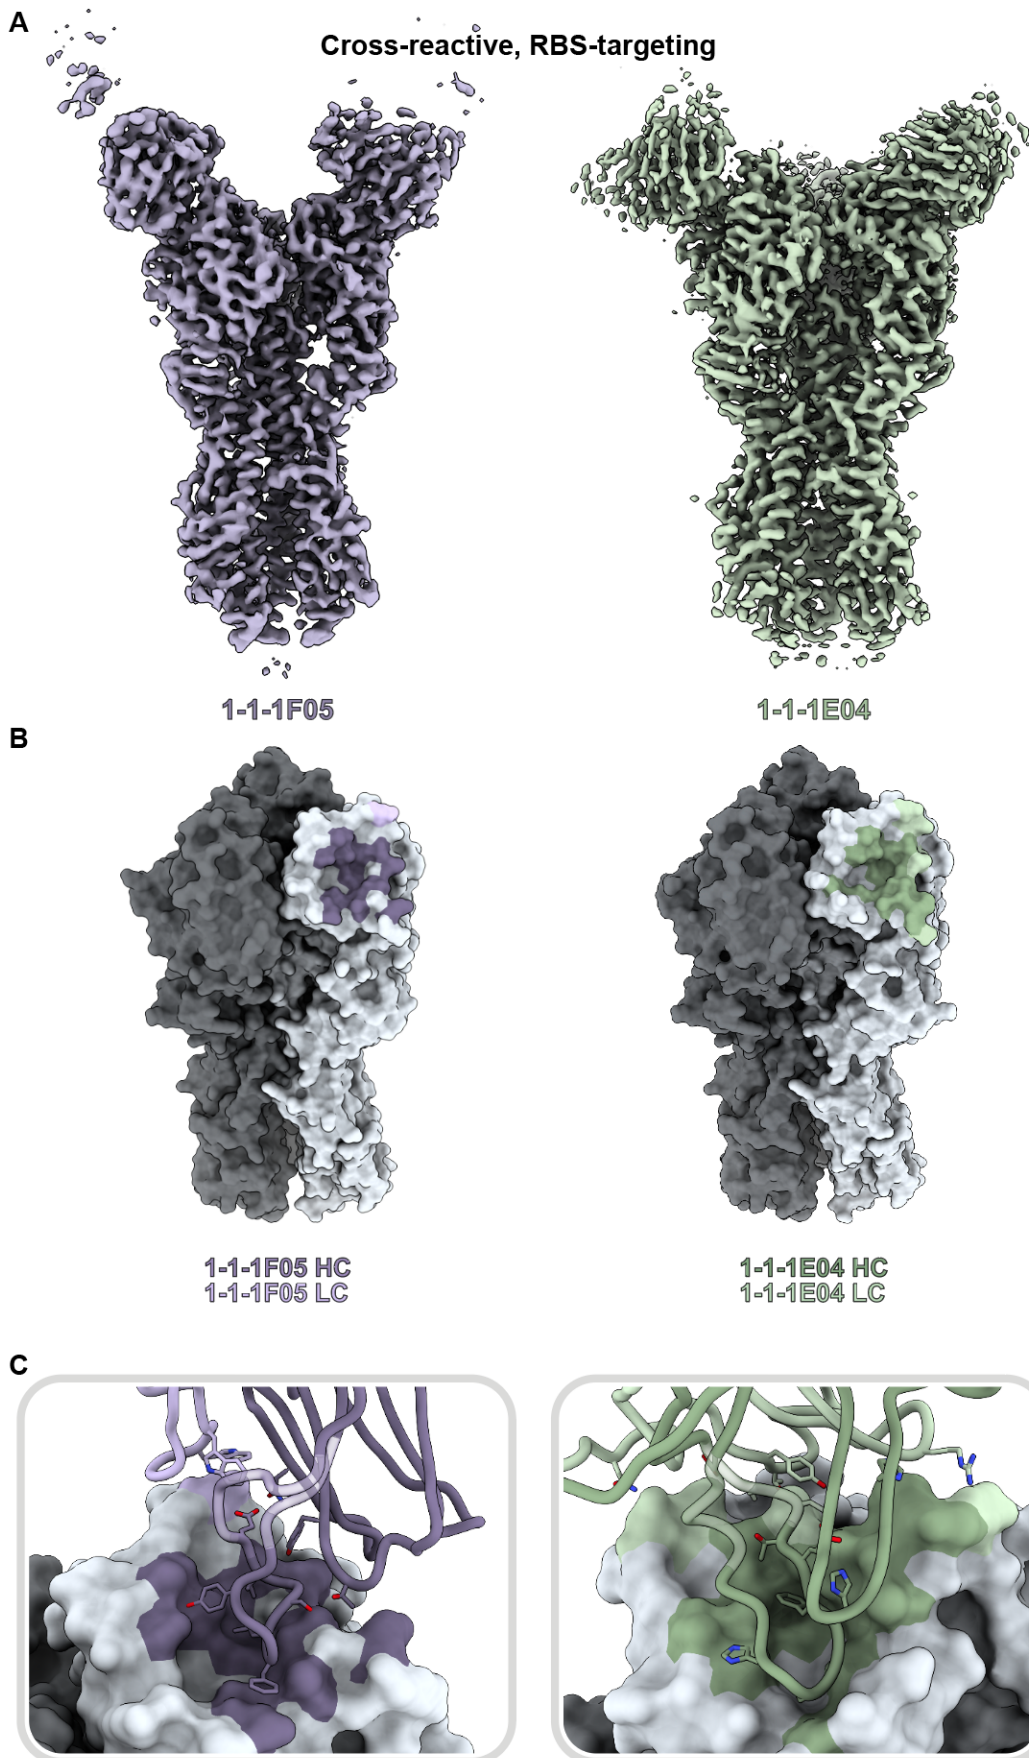

**Figure S7: Cross-reactive mAb binding to H1 NC99.** Related to Figure 6. (A) Cryo-EM reconstructions of mAbs 1-1-1F05 and 1-1-1E04 bound to H1 NC99. Antibody footprint of 1-1-1F05 and 1-1-1E04 colored to indicate heavy and light chain interactions on H1 NC99. (C) Antibody loop interactions with H1 NC99.

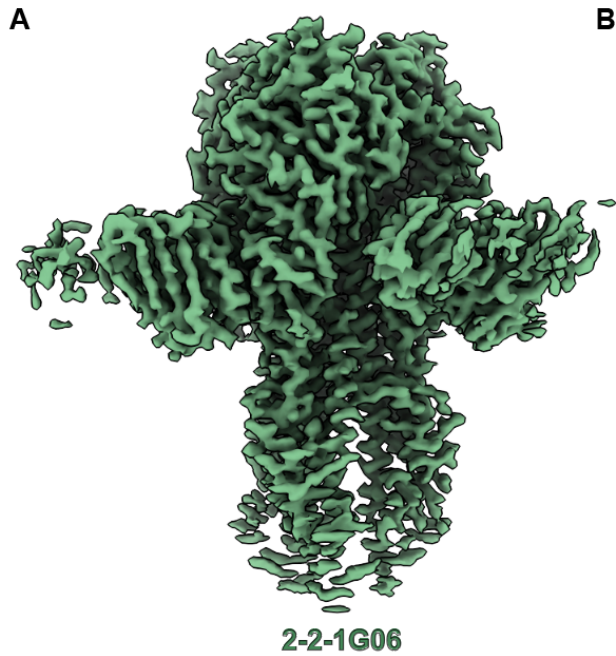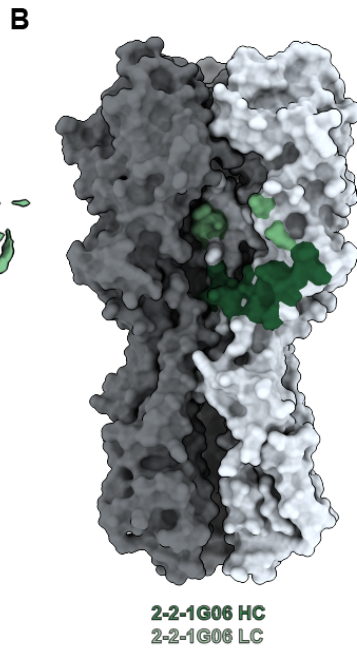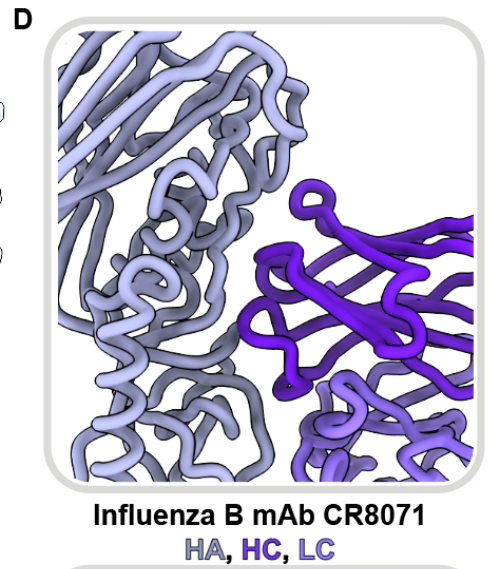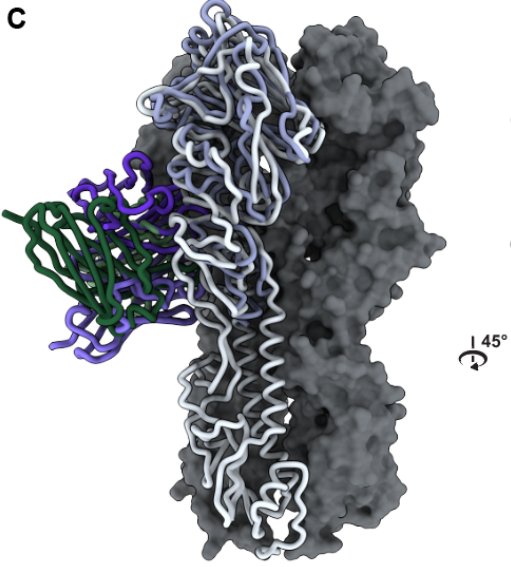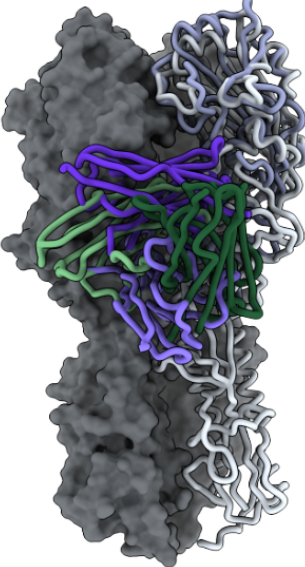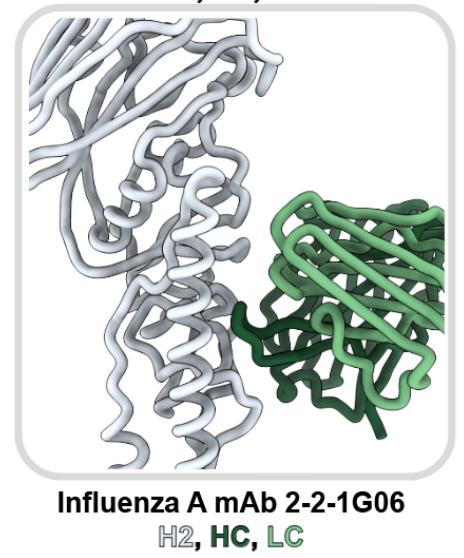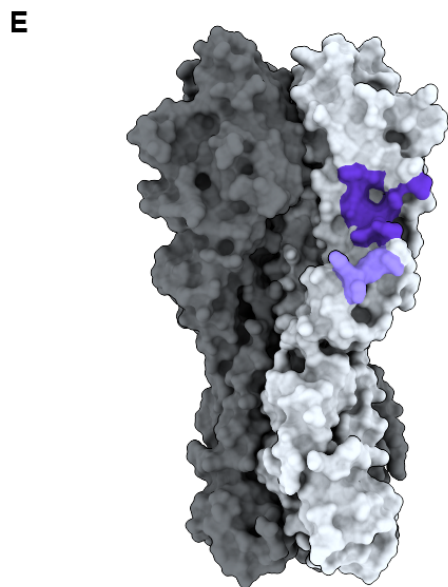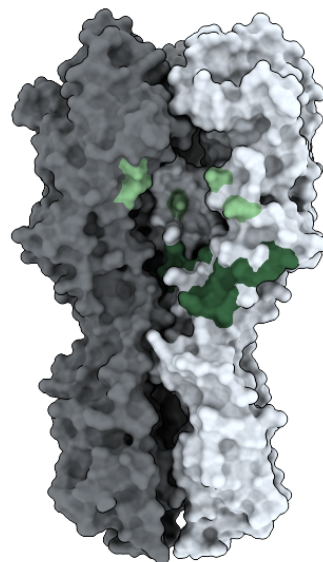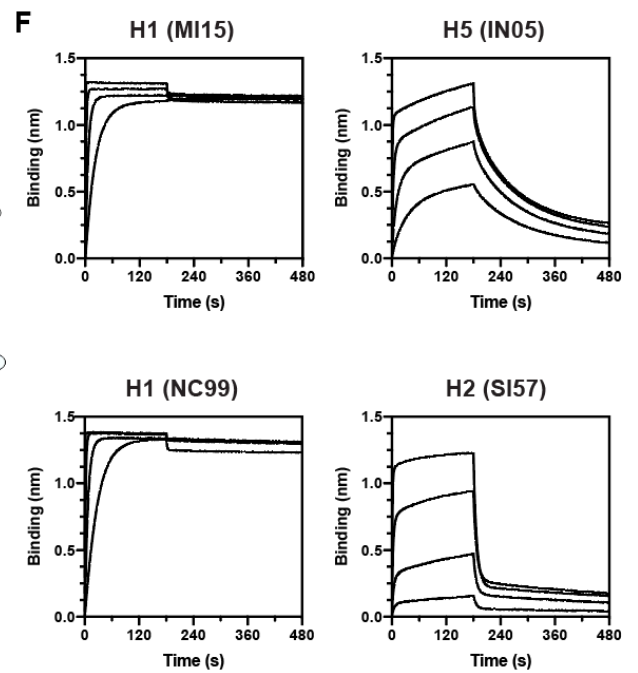



**Figure S8: MAb 2-2-1G06 interaction with H1 and comparison to CR8071 and binding kinetics.** Related to Figure 7. (A) cryoEM density map of 2-2-1G06 Fab complexed with H1. (B) Antibody footprint of 2-2-1G06 colored to indicate heavy and light chain interactions on H1. (C & D) Comparison of influenza B mAb CR8071 (purple; PDB 4FQJ) bound to HA (PDBs 4FQJ and 4M44) and 2-2-1G06 (green) bound to H2. (E) Antibody footprints of 2-2-1G06 on H2 and CR8071 on HA (PDBs 4FQJ and 4FQM). (F) BLI sensorgrams indicating immobilized mAb 2-2-1G06 binding to H1, H2, or H5 HAs at concentrations of 3200, 800, 200, and 50 nM.

**Table S1: nsEMPEM map and deposition details.** Related to Figures 2 and 4.

|                       | <b>EMDB ID</b> | <b>Time point</b> | <b># particles<br/>(composite)</b> | <b>Microscope</b> | <b>Pixel size</b> |
|-----------------------|----------------|-------------------|------------------------------------|-------------------|-------------------|
| <b>Donor 1-1 (H2)</b> | EMD-41514      | 0                 | 7,863                              | Tecnai TF20       | 1.77              |
|                       | EMD-41515      | 4                 | 11,200                             | Tecnai Spirit     | 2.06              |
|                       | EMD-41516      | 16                | 17,496                             | Tecnai Spirit     | 2.06              |
|                       | EMD-41517      | 20                | 51,147                             | Tecnai Spirit     | 2.06              |
| <b>Donor 1-2 (H2)</b> | EMD-41518      | 0                 | 2,167                              | Tecnai Spirit     | 2.06              |
|                       | EMD-41519      | 4                 | 9,223                              | Tecnai TF20       | 1.77              |
|                       | EMD-41520      | 16                | 3,572                              | Tecnai Spirit     | 2.06              |
|                       | EMD-41521      | 20                | 57,429                             | Tecnai Spirit     | 2.06              |
| <b>Donor 1-3 (H2)</b> | EMD-41522      | 20                | 33,782                             | Tecnai Spirit     | 2.06              |
| <b>Donor 2-1 (H2)</b> | EMD-41523      | 4                 | 37,664                             | Tecnai TF20       | 1.77              |
|                       | EMD-41524      | 16                | 80,050                             | Tecnai Spirit     | 2.06              |
|                       | EMD-41525      | 20                | 48,917                             | Tecnai Spirit     | 2.06              |
| <b>Donor 2-2 (H2)</b> | EMD-41526      | 0                 | 5,252                              | Tecnai TF20       | 1.77              |
|                       | EMD-41527      | 4                 | 23,361                             | Tecnai Spirit     | 2.06              |
|                       | EMD-41528      | 16                | 12,935                             | Tecnai Spirit     | 2.06              |
|                       | EMD-41529      | 20                | 39,714                             | Tecnai Spirit     | 2.06              |
| <b>Donor 2-3 (H2)</b> | EMD-41530      | 4                 | 19,649                             | Tecnai Spirit     | 2.06              |
|                       | EMD-41531      | 16                | 3,437                              | Tecnai TF20       | 1.77              |
|                       | EMD-41532      | 20                | 16,270                             | Tecnai Spirit     | 2.06              |
| <b>Donor 3-1 (H2)</b> | EMD-41533      | 0                 | 7,280                              | Tecnai Spirit     | 2.06              |
|                       | EMD-41534      | 4                 | 27,785                             | Tecnai TF20       | 1.77              |
|                       | EMD-41535      | 16                | 31,686                             | Tecnai Spirit     | 2.06              |
|                       | EMD-41536      | 20                | 33,852                             | Tecnai Spirit     | 2.06              |
| <b>Donor 3-2 (H2)</b> | EMD-41537      | 0                 | 20,800                             | Tecnai TF20       | 1.77              |
|                       | EMD-41538      | 4                 | 19,649                             | Tecnai Spirit     | 2.06              |
|                       | EMD-41539      | 16                | 41,400                             | Tecnai TF20       | 1.77              |
|                       | EMD-41540      | 20                | 106,050                            | Tecnai Spirit     | 2.06              |
| <b>Donor 3-3 (H2)</b> | EMD-41541      | 0                 | 30,603                             | Tecnai Spirit     | 2.06              |
|                       | EMD-41542      | 4                 | 27,331                             | Tecnai Spirit     | 2.06              |
|                       | EMD-41543      | 16                | 19,700                             | Tecnai Spirit     | 2.06              |
|                       | EMD-41544      | 20                | 59,878                             | Tecnai Spirit     | 2.06              |
| <b>Donor 4-1 (H2)</b> | EMD-41545      | 0                 | 27,266                             | Tecnai Spirit     | 2.06              |
|                       | EMD-41546      | 4                 | 54,296                             | Tecnai Spirit     | 2.06              |
|                       | EMD-41547      | 16                | 89,300                             | FEI Talos         | 1.98              |
|                       | EMD-41548      | 20                | 93,574                             | Tecnai Spirit     | 2.06              |
| <b>Donor 4-2 (H2)</b> | EMD-41549      | 0                 | 18,505                             | Tecnai Spirit     | 2.06              |
|                       | EMD-41550      | 4                 | 50,289                             | Tecnai Spirit     | 2.06              |
|                       | EMD-41551      | 16                | 10,340                             | Tecnai Spirit     | 2.06              |
|                       | EMD-41552      | 20                | 49,813                             | Tecnai TF20       | 1.77              |
| <b>Donor 4-3 (H2)</b> | EMD-41553      | 0                 | 11,809                             | Tecnai Spirit     | 2.06              |
|                       | EMD-41554      | 4                 | 82,814                             | Tecnai Spirit     | 2.06              |
|                       | EMD-41555      | 16                | 14,356                             | Tecnai Spirit     | 2.06              |
|                       | EMD-41556      | 20                | 66,790                             | FEI Talos         | 1.98              |
| <b>Donor 1-1 (H1)</b> | EMD-41557      | 0                 | 33,500                             | Tecnai TF20       | 1.77              |
|                       | EMD-41558      | 4                 | 26,600                             | Tecnai TF20       | 1.77              |
|                       | EMD-41559      | 16                | 19,300                             | Tecnai TF20       | 1.77              |
|                       | EMD-41560      | 20                | 53,500                             | Tecnai TF20       | 1.77              |
| <b>Donor 2-2 (H1)</b> | EMD-41561      | 0                 | 34,000                             | Tecnai TF20       | 1.77              |
|                       | EMD-41562      | 4                 | 88,000                             | Tecnai TF20       | 1.77              |
|                       | EMD-41563      | 16                | 65,400                             | Tecnai TF20       | 1.77              |
|                       | EMD-41564      | 20                | 45,700                             | Tecnai TF20       | 1.77              |

**Table S2: Cryo-EM map and atomic model refinement.** Related to Figures 5, 6, and 7.

|                                                     | 1-1-1F05<br>bound to<br>H2 | 1-1-1F05<br>bound to<br>H1 | 1-1-1E04<br>bound to<br>H2 | 1-1-1E04<br>bound to<br>H1 | 4-1-1E02<br>bound to<br>H2 | 4-1-1G03<br>bound to<br>H2 | 2-2-1G06<br>bound to<br>H2 | 2-2-1G06<br>bound to<br>H1 | pAb_1<br>bound to<br>H2 | pAb_2<br>bound to<br>H2 | pAb_3<br>bound to<br>H2 |
|-----------------------------------------------------|----------------------------|----------------------------|----------------------------|----------------------------|----------------------------|----------------------------|----------------------------|----------------------------|-------------------------|-------------------------|-------------------------|
| <b>Access codes</b>                                 |                            |                            |                            |                            |                            |                            |                            |                            |                         |                         |                         |
| PDB                                                 | 8TP2                       | 8TP3                       | 8TP4                       | 8TP5                       | 8TP6                       | 8TP7                       | 8TP9                       | 8TPA                       | N/A                     | N/A                     | N/A                     |
| EMDB                                                | EMD-41464                  | EMD-41465                  | EMD-41466                  | EMD-41467                  | EMD-41468                  | EMD-41469                  | EMD-41470                  | EMD-41471                  | EMD-41472               | EMD-41473               | EMD-41474               |
| GenBank                                             | BAF48641.1                 | AAP34324.1                 | BAF48641.1                 | AAP34324.1                 | BAF48641.1                 | BAF48641.1                 | BAF48641.1                 | AAP34324.1                 | N/A                     | N/A                     | N/A                     |
| <b>Data collection and processing</b>               |                            |                            |                            |                            |                            |                            |                            |                            |                         |                         |                         |
| Microscope                                          | Talos Arctica              | Talos Arctica              | Talos Arctica              | Talos Arctica              | Talos Arctica              | Talos Arctica              | Talos Arctica              | Talos Arctica              | Titan Krios             | Titan Krios             | Talos Arctica           |
| Magnification                                       | 36,000                     | 36,000                     | 36,000                     | 36,000                     | 36,000                     | 36,000                     | 36,000                     | 36,000                     | 130,000                 | 130,000                 | 36,000                  |
| Voltage (kV)                                        | 200                        | 200                        | 200                        | 200                        | 200                        | 200                        | 200                        | 200                        | 300                     | 300                     | 200                     |
| Electron exposure (e <sup>-</sup> /Å <sup>2</sup> ) | 53.5                       | 49.0                       | 49.2                       | 46.2                       | 49.0                       | 49.0                       | 46.2                       | 48.6                       | 49.7                    | 49.7                    | 50.3                    |
| Defocus range (µm)                                  | -0.7 to -2                 | -0.7 to -2                 | -0.7 to -2                 | -0.7 to -2                 | -0.7 to -2                 | -0.7 to -2                 | -0.7 to -2                 | -0.7 to -2                 | -0.7 to -2              | -0.7 to -2              | -0.7 to -2              |
| Pixel size (Å)                                      | 1.150                      | 1.15                       | 1.150                      | 1.15                       | 1.150                      | 1.150                      | 1.150                      | 1.150                      | 1.045                   | 1.045                   | 1.045                   |
| Imposed Symmetry                                    | C1                         | C1                         | C1                         | C3                         | C3                         | C3                         | C3                         | C3                         | C1                      | C1                      | C1                      |
| Final particle number                               | 230,649                    | 105,408                    | 117,851                    | 167,166                    | 103,798                    | 271,581                    | 164,150                    | 124,412                    | 39,631                  | 61,108                  | 17,933                  |
| Map resolution (Å)                                  | 3.1                        | 3.6                        | 3.3                        | 2.9                        | 3.1                        | 2.8                        | 3.1                        | 3.0                        | 2.9                     | 2.8                     | 6.1                     |
| FSC Threshold                                       | 0.143                      | 0.143                      | 0.143                      | 0.143                      | 0.143                      | 0.143                      | 0.143                      | 0.143                      | 0.143                   | 0.143                   | 0.143                   |
| Map sharpening B-factor (Å <sup>2</sup> )           | -37.9                      | -99.7                      | -40.8                      | -95.0                      | -94.9                      | -105.9                     | -99.6                      | -83.7                      | -56.3                   | -58.8                   | -138.4                  |
| <b>Model refinement and validation</b>              |                            |                            |                            |                            |                            |                            |                            |                            |                         |                         |                         |
| Total Residues                                      | 1697                       | 1720                       | 1697                       | 2223                       | 2153                       | 2163                       | 2157                       | 2172                       |                         |                         |                         |
| Amino-acids                                         | 1678                       | 1700                       | 1678                       | 2205                       | 2126                       | 2145                       | 2142                       | 2154                       |                         |                         |                         |
| Carbohydrates                                       | 19                         | 20                         | 18                         | 18                         | 27                         | 18                         | 15                         | 18                         |                         |                         |                         |
| RMSD Lengths (Å)                                    | 0.020                      | 0.020                      | 0.020                      | 0.021                      | 0.021                      | 0.021                      | 0.020                      | 0.021                      |                         |                         |                         |
| RMSD Angles (°)                                     | 1.7                        | 1.7                        | 1.8                        | 1.9                        | 1.8                        | 1.8                        | 1.8                        | 1.8                        |                         |                         |                         |
| <b>Ramachandran</b>                                 |                            |                            |                            |                            |                            |                            |                            |                            |                         |                         |                         |
| Outliers (%)                                        | 0                          | 0                          | 0                          | 0                          | 0                          | 0                          | 0                          | 0                          | N/A                     | N/A                     | N/A                     |
| Allowed (%)                                         | 2.2                        | 1.7                        | 2.7                        | 1.8                        | 1.2                        | 1.7                        | 1.9                        | 1.3                        |                         |                         |                         |
| Favored (%)                                         | 97.8                       | 98.28                      | 97.4                       | 98.21                      | 98.8                       | 98.3                       | 98.1                       | 98.7                       |                         |                         |                         |
| Rotamer outliers (%)                                | 0                          | 0.07                       | 0                          | 0.11                       | 0                          | 0                          | 0                          | 0                          |                         |                         |                         |
| Clash score                                         | 1.6                        | 0.8                        | 2.9                        | 1.6                        | 1.9                        | 1.4                        | 2.3                        | 1.5                        |                         |                         |                         |
| Molprobity score                                    | 0.94                       | 0.75                       | 1.21                       | 0.91                       | 0.95                       | 0.88                       | 1.00                       | 0.89                       |                         |                         |                         |
| FSC model (0/0.143/0.5)                             | 2.7/2.8/3.1                | 3.5/3.5/3.9                | 2.9/3.0/3.3                | 2.7/2.8/3.1                | 3.0/3.1/3.3                | 2.8/2.8/3.0                | 3.0/3.1/3.3                | 2.9/2.9/3.2                |                         |                         |                         |
| EMRinger score                                      | 4.2                        | 2.4                        | 4.0                        | 3.4                        | 3.7                        | 4.8                        | 3.5                        | 4.7                        |                         |                         |                         |

**Table S3: nsEM map and deposition details for monoclonal immune complexes.** Related to Figures 4 and 5.

| <b>Monoclonal ID</b> | <b>EMDB ID</b> | <b>Breadth</b> | <b># particles<br/>(composite)</b> | <b>Symmetry</b> | <b>Microscope</b> | <b>Pixel size (Å)</b> |
|----------------------|----------------|----------------|------------------------------------|-----------------|-------------------|-----------------------|
| <b>2-2-1E08</b>      | EMD-41683      | H2             | 3,672                              | C1              | Tecnai Spirit     | 2.06                  |
| <b>2-2-1C06</b>      | EMD-41684      | H2             | 11,091                             | C1              | Tecnai Spirit     | 2.06                  |
| <b>4-1-1E02</b>      | EMD-41685      | H2             | 25,927                             | C1              | Tecnai Spirit     | 2.06                  |
| <b>4-1-1G03</b>      | EMD-41686      | H2             | 14,494                             | C3              | Tecnai Spirit     | 2.06                  |
| <b>1-3-1F08</b>      | EMD-41687      | H2             | 4,424                              | C1              | Tecnai Spirit     | 2.06                  |
| <b>1-1-1F05</b>      | EMD-41688      | cross-reactive | 2,741                              | C1              | Tecnai Spirit     | 2.06                  |
| <b>2-2-1F01</b>      | EMD-41689      | cross-reactive | 22,641                             | C1              | Tecnai Spirit     | 2.06                  |
| <b>2-2-1G06</b>      | EMD-41690      | cross-reactive | 2,651                              | C1              | Tecnai Spirit     | 2.06                  |
| <b>1-2-189-34</b>    | EMD-41691      | cross-reactive | 29,435                             | C3              | Tecnai F20        | 1.77                  |
| <b>1-1-1A09</b>      | EMD-41692      | cross-reactive | 17020.00                           | C3              | Tecnai F20        | 1.77                  |
| <b>1-1-2A11</b>      | EMD-41693      | cross-reactive | 4,231                              | C3              | Tecnai F20        | 1.77                  |
| <b>1-1-2E05</b>      | EMD-41694      | cross-reactive | 8,762                              | C3              | Tecnai F20        | 1.77                  |
